# Supplementary material
Source: Springer Nature journal article supplement (https://www.springermedizin.de/resource/supplementary/12930_2013_60_MOESM1_ESM.pdf/9424664)

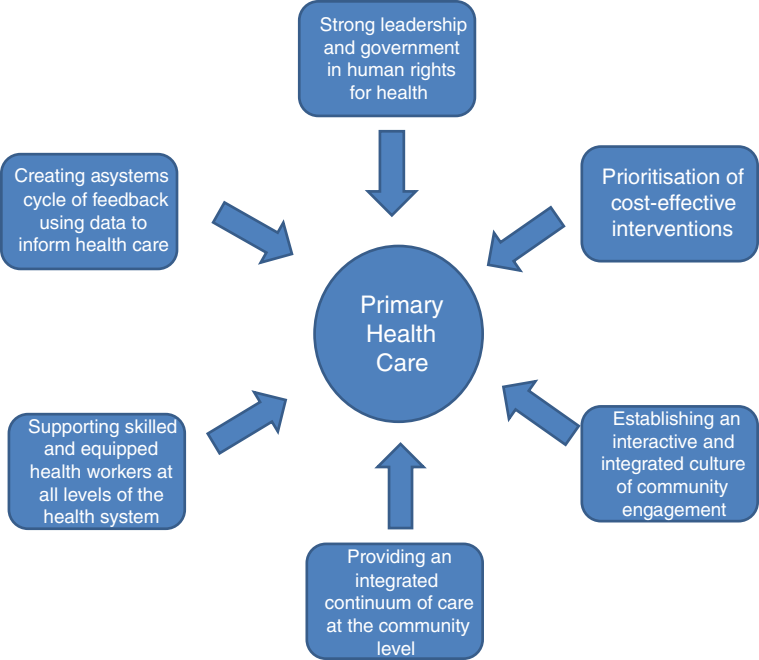

Supplement: MOESM1 [file 9424664]
